# Supplementary material
Source: PubMed Central journal article supplement (PMC5936622)
Supplement: NIHMS963287-supplement-Supp_Table_1.pdf [file NIHMS963287-supplement-Supp_Table_1.pdf]

**Supplementary Table 1: Summary of 35 QTL regulating responses to estrogen in 5 tissues of rats and mice.**

| Phenotype                     | Strains              | Locus          | Markers                 | Reference                                      |
|-------------------------------|----------------------|----------------|-------------------------|------------------------------------------------|
| <b>A. Rat Mammary Gland</b>   |                      |                |                         |                                                |
| latency, tumor number         | ACI x COP            | <i>Emca1</i>   | D5Rat30-D5Rat53         | (Gould et al. 2004)                            |
| latency                       | ACI x COP            | <i>Emca2</i>   | D18Rat21                | (Gould et al. 2004)                            |
| latency, tumor number         | ACI x COP            | <i>Emca3</i>   | D2Rat16                 | (Colletti et al. 2014; Shull et al. 2007)      |
| latency, tumor number         | ACI x COP            | <i>Emca4</i>   | D7Rat19                 | (Schaffer et al. 2013)                         |
| latency, tumor number         | ACI x COP            | <i>Emca5</i>   | D3Rat114                | (Schaffer et al. 2013)                         |
| tumor number                  | ACI x COP            | <i>Emca6</i>   | D4Rat103                | (Schaffer et al. 2013)                         |
| tumor number                  | ACI x COP            | <i>Emca7</i>   | D6Rat22                 | (Schaffer et al. 2013)                         |
| latency, tumor number         | ACI x COP            | <i>Emca8</i>   | D5Rat95                 | (Schaffer et al. 2013)                         |
| latency, tumor number         | ACI x COP            | <i>Emca9</i>   | D18Rat30                | (Colletti et al. 2014; Shull et al. 2007)      |
| <b>B. Mouse Uterus</b>        |                      |                |                         |                                                |
| weight                        | C57BL6/J x C3H/HeJ   | <i>Est2</i>    | <i>D5Mit296</i>         | (Roper et al. 1999)                            |
| weight                        | C57BL6/J x C3H/HeJ   | <i>Est3</i>    | <i>D11Mit67</i>         | (Roper et al. 1999)                            |
| eosinophils                   | C57BL6/J x C3H/HeJ   | <i>Est1</i>    | <i>D4Mit6</i>           | (Roper et al. 1999)                            |
| eosinophils                   | C57BL6/J x C3H/HeJ   | <i>Est4</i>    | <i>D10Mit180</i>        | (Roper et al. 1999)                            |
| eosinophils                   | C57BL6/J x C3H/HeJ   | <i>Est5</i>    | <i>D16Mit44</i>         | (Roper et al. 1999)                            |
| <b>C. Rat Uterus</b>          |                      |                |                         |                                                |
| pyometritis                   | BN x ACI             | <i>Eutr1</i>   | <i>D5Rat190</i>         | (Gould et al. 2005)                            |
| pyometritis                   | F344.BN-congenic rat | <i>Eutr2</i>   | <i>D5Mgh17-D5Rat205</i> | (Pandey et al. 2005)                           |
| <b>D. Rat Uterus</b>          |                      |                |                         |                                                |
| pituitary weight, DNA content | F344 x BN            | <i>Edpm2-1</i> | <i>D2Mgh14-D2Mit4</i>   | (Wendell et al. 2000; Wendell and Gorski 1997) |
| pituitary weight              | F344 x BN            | <i>Edpm2-2</i> | <i>D2Mgh15</i>          | (Wendell and Gorski 1997)                      |
| pituitary weight              | F344 x BN            | <i>Edpm3</i>   | <i>D3Mit7</i>           | (Wendell and Gorski 1997)                      |
| pituitary weight              | F344 x BN            | <i>Edpm5</i>   | <i>D5Mit11</i>          | (Wendell and Gorski 1997)                      |
| pituitary weight              | F344 x BN            | <i>Edpm9</i>   | <i>D9Mgh2</i>           | (Wendell and Gorski 1997)                      |
| pituitary weight, DNA content | (F344xBN)F1xF344     | <i>Edpm9-2</i> | <i>D9Rat31</i>          | (Wendell et al. 2000)                          |
| pituitary weight              | ACI x COP            | <i>Ept1</i>    | D6Rat80                 | (Strecker et al. 2005)                         |
| pituitary weight              | ACI x COP            | <i>Ept2</i>    | D3Rat37                 | (Strecker et al. 2005)                         |
| pituitary weight              | BN x ACI             | <i>Ept5</i>    | D4Mgh7                  | (Shull et al. 2007)                            |
| pituitary weight              | ACI x COP            | <i>Ept6</i>    | D3Mgh9                  | (Strecker et al. 2005)                         |
| pituitary weight              | BN x ACI             | <i>Ept7</i>    | D7Rat19                 | (Shull et al. 2007)                            |
| pituitary weight              | ACI x COP            | <i>Ept9</i>    | D10Mit7                 | (Strecker et al. 2005)                         |
| pituitary weight              | ACI x COP            | <i>Ept10</i>   | D1Rat119                | (Strecker et al. 2005)                         |
| pituitary weight              | ACI x COP            | <i>Ept13</i>   | D1Rat192                | (Strecker et al. 2005)                         |
| <b>E. Rat Thymus</b>          |                      |                |                         |                                                |
| Thymic atrophy                | BN X ACI             | <i>Esta1</i>   | <i>D10Mgh10</i>         | (Gould et al. 2006)                            |
| Thymic atrophy                | BN X ACI             | <i>Esta2</i>   | <i>D2Rat61</i>          | (Gould et al. 2006)                            |
| Thymic atrophy                | BN X ACI             | <i>Esta3</i>   | <i>D2Rat34</i>          | (Gould et al. 2006)                            |
| <b>F. Rat Testes</b>          |                      |                |                         |                                                |
| Testicular weight             | LEXF/FXLE            |                | D7Mit4                  | (Tachibana et al. 2006)                        |
| Testicular weight             | LEXF/FXLE            |                | D1Wox25                 | (Tachibana et al. 2006)                        |

**A.** Mammary tumor phenotypes in rats were observed following chronic administration of 17 $\beta$ -estradiol. **B.** Uterine responses in ovariectomized mice were induced by acute treatment with 17 $\beta$ -estradiol for 4 days. **C.** Uterine phenotypes in rats were induced by chronic administration of diethylstilbestrol. **D.** Phenotypes in the pituitary of rats were induced by chronic administration of either 17 $\beta$ -estradiol or diethylstilbestrol. **E.** Phenotypes in the thymus of rats were induced by chronic administration of either 17 $\beta$ -estradiol or diethylstilbestrol. **F.** Testes phenotypes in rats were induced by chronic administration of diethylstilbestrol. Details of experiments can be found in the references provided.

## References

- Colletti JA, 2nd, Leland-Wavrin KM, Kurz SG, Hickman MP, Seiler NL, Samanas NB, Eckert QA, Dennison KL, Ding L, Schaffer BS, Shull JD (2014) Validation of six genetic determinants of susceptibility to estrogen-induced mammary cancer in the rat and assessment of their relevance to breast cancer risk in humans. *G3 (Bethesda, Md.)* 4, 1385-1394
- Gould KA, Pandey J, Lachel CM, Murrin CR, Flood LA, Pennington KL, Schaffer BS, Tochacek M, McComb RD, Meza JL, Wendell DL, Shull JD (2005) Genetic mapping of *Eutr1*, a locus controlling E2-induced pyometritis in the Brown Norway rat, to RNO5. *Mamm Genome* 16, 854-864
- Gould KA, Strecker TE, Hansen KK, Bynote KK, Peterson KA, Shull JD (2006) Genetic mapping of loci controlling diethylstilbestrol-induced thymic atrophy in the Brown Norway rat. *Mamm Genome* 17, 451-464
- Gould KA, Tochacek M, Schaffer BS, Reindl TM, Murrin CR, Lachel CM, VanderWoude EA, Pennington KL, Flood LA, Bynote KK, Meza JL, Newton MA, Shull JD (2004) Genetic determination of susceptibility to estrogen-induced mammary cancer in the ACI rat: mapping of *Emca1* and *Emca2* to chromosomes 5 and 18. *Genetics* 168, 2113-2125
- Pandey J, Gould KA, McComb RD, Shull JD, Wendell DL (2005) Localization of *Eutr2*, a locus controlling susceptibility to DES-induced uterine inflammation and pyometritis, to RNO5 using a congenic rat strain. *Mamm Genome* 16, 865-872
- Roper RJ, Griffith JS, Lyttle CR, Doerge RW, McNabb AW, Broadbent RE, Teuscher C (1999) Interacting quantitative trait loci control phenotypic variation in murine estradiol-regulated responses. *Endocrinology* 140, 556-561
- Schaffer BS, Leland-Wavrin KM, Kurz SG, Colletti JA, Seiler NL, Warren CL, Shull JD (2013) Mapping of three genetic determinants of susceptibility to estrogen-induced mammary cancer within the *Emca8* locus on rat chromosome 5. *Cancer prevention research* 6, 59-69
- Shull JD, Lachel CM, Murrin CR, Pennington KL, Schaffer BS, Strecker TE, Gould KA (2007) Genetic control of estrogen action in the rat: mapping of QTLs that impact pituitary lactotroph hyperplasia in a BN x ACI intercross. *Mamm Genome* 18, 657-669
- Strecker TE, Spady TJ, Schaffer BS, Gould KA, Kaufman AE, Shen F, McLaughlin MT, Pennington KL, Meza JL, Shull JD (2005) Genetic bases of estrogen-induced pituitary tumorigenesis: identification of genetic loci determining estrogen-induced pituitary growth in reciprocal crosses between the ACI and Copenhagen rat strains. *Genetics* 169, 2189-2197
- Tachibana M, Lu L, Hiai H, Tamura A, Matsushima Y, Shisa H (2006) Quantitative trait loci determining weight reduction of testes and pituitary by diethylstilbesterol in LEXF and FXLE recombinant inbred strain rats. *Experimental animals* 55, 91-95
- Wendell DL, Daun SB, Stratton MB, Gorski J (2000) Different functions of QTL for estrogen-dependent tumor growth of the rat pituitary. *Mammalian genome : official journal of the International Mammalian Genome Society* 11, 855-861
- Wendell DL, Gorski J (1997) Quantitative trait loci for estrogen-dependent pituitary tumor growth in the rat. *Mammalian genome : official journal of the International Mammalian Genome Society* 8, 823-829
